# Supplementary material
Source: publisher site journal article supplement (https://www.spandidos-publications.com/2266/downloadSupplementary)

Figure S1. Expression of HVEM in the primary MSCs from ICC tissues and HVEM-overexpressed MSCs. Western blotting was employed to detect the level of HVEM in the primary MSCs sorted from ICC tissues by FACS and HVEM-overexpressed MSCs by adenovirus. HVEM, herpesvirus entry mediator; MSCs, mesenchymal stem cells; ICC, intrahepatic cholangio-carcinoma; FACS, fluorescence-activated cell sorting.

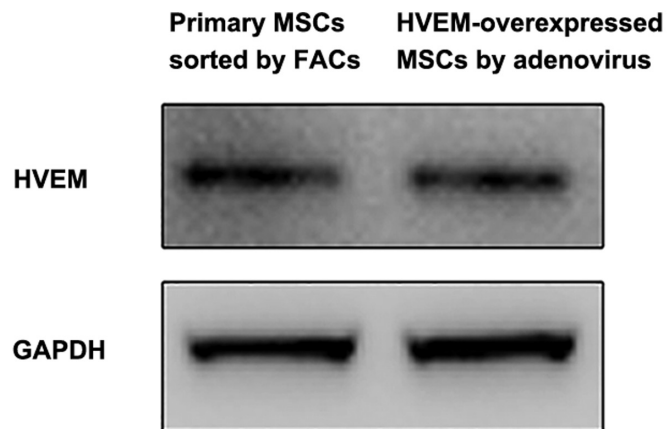

Supplement: Supplementary file 1 [file downloadSupplementary]
